# Supplementary material for: Sibling rank and sibling number in relation to cardiovascular disease and mortality risk: a nationwide cohort study
Source: HighWire-hosted journal article supplement (doi:10.1136/bmjopen-2020-042881), 2021-05-25
Supplement: bmjopen-2020-042881supp001_data_supplement.pdf [file bmjopen-2020-042881supp001_data_supplement.pdf]

**Supplementary Table 1a. Distribution of population, number of CVD, CHD, and mortality events in men.**

|                                                         | Population |      | CVD events |      | CHD events |      | Mortality events |      |
|---------------------------------------------------------|------------|------|------------|------|------------|------|------------------|------|
|                                                         | No.        | (%)  | No.        | %    | No.        | %    | No.              | %    |
| Total population (%)                                    | 1358647    |      | 592863     |      | 131533     |      | 240371           |      |
| Age (years)                                             |            |      |            |      |            |      |                  |      |
| 30-39                                                   | 531559     | 39.1 | 152615     | 25.7 | 25327      | 19.3 | 39094            | 16.3 |
| 40-49                                                   | 554137     | 40.8 | 265251     | 44.7 | 59088      | 44.9 | 96549            | 40.2 |
| 50-58                                                   | 272951     | 20.1 | 174997     | 29.5 | 47118      | 35.8 | 104728           | 43.6 |
| Family income                                           |            |      |            |      |            |      |                  |      |
| Low income                                              | 334083     | 24.6 | 123575     | 20.8 | 26649      | 20.3 | 47582            | 19.8 |
| Middle-low income                                       | 320284     | 23.6 | 135148     | 22.8 | 29613      | 22.5 | 51243            | 21.3 |
| Middle-high income                                      | 321653     | 23.7 | 152589     | 25.7 | 35041      | 26.6 | 66400            | 27.6 |
| High income                                             | 382627     | 28.2 | 181551     | 30.6 | 40230      | 30.6 | 75146            | 31.3 |
| Marital status                                          |            |      |            |      |            |      |                  |      |
| Married/cohabiting                                      | 809314     | 59.6 | 370633     | 62.5 | 85212      | 64.8 | 124039           | 51.6 |
| Never married, Widowed, or divorced                     | 549333     | 40.4 | 222230     | 37.5 | 46321      | 35.2 | 116332           | 48.4 |
| Educational attainment                                  |            |      |            |      |            |      |                  |      |
| ≤ 9 years                                               | 281207     | 20.7 | 146179     | 24.7 | 38890      | 29.6 | 81428            | 33.9 |
| 10-11 years                                             | 173208     | 12.7 | 67512      | 11.4 | 13955      | 10.6 | 26218            | 10.9 |
| ≥ 12 years                                              | 904232     | 66.6 | 379172     | 64.0 | 78688      | 59.8 | 132725           | 55.2 |
| Immigrant status                                        |            |      |            |      |            |      |                  |      |
| Sweden                                                  | 1322658    | 97.4 | 580707     | 97.9 | 128732     | 97.9 | 235464           | 98.0 |
| Other countries                                         | 35989      | 2.6  | 12156      | 2.1  | 2801       | 2.1  | 4907             | 2.0  |
| Socioeconomic status                                    |            |      |            |      |            |      |                  |      |
| Farmers/self-employed/others                            | 308729     | 22.7 | 129408     | 21.8 | 29064      | 22.1 | 71960            | 29.9 |
| Blue collar workers                                     | 494090     | 36.4 | 217215     | 36.6 | 50626      | 38.5 | 89989            | 37.4 |
| White collar workers                                    | 351621     | 25.9 | 157170     | 26.5 | 34594      | 26.3 | 52582            | 21.9 |
| Professionals                                           | 204207     | 15.0 | 89070      | 15.0 | 17249      | 13.1 | 25840            | 10.8 |
| Urban/rural status                                      |            |      |            |      |            |      |                  |      |
| Large cities                                            | 495681     | 36.5 | 207593     | 35.0 | 41153      | 31.3 | 85765            | 35.7 |
| Southern Sweden                                         | 618686     | 45.5 | 274100     | 46.2 | 61581      | 46.8 | 108663           | 45.2 |
| Northern Sweden                                         | 244280     | 18.0 | 111170     | 18.8 | 28799      | 21.9 | 45943            | 19.1 |
| Hospitalization of alcoholism and related liver disease |            |      |            |      |            |      |                  |      |
| No                                                      | 1275305    | 93.9 | 548796     | 92.6 | 124051     | 94.3 | 202724           | 84.3 |
| Yes                                                     | 83342      | 6.1  | 44067      | 7.4  | 7482       | 5.7  | 37647            | 15.7 |
| Hospitalization of diabetes                             |            |      |            |      |            |      |                  |      |
| No                                                      | 1226642    | 90.3 | 494000     | 83.3 | 104716     | 79.6 | 200226           | 83.3 |
| Yes                                                     | 132005     | 9.7  | 988863     | 16.7 | 26817      | 20.4 | 40145            | 16.7 |

|                                                      |         |      |        |      |        |      |        |      |
|------------------------------------------------------|---------|------|--------|------|--------|------|--------|------|
| Hospitalization of hypertension                      |         |      |        |      |        |      |        |      |
| No                                                   | 1059935 | 78.0 | 294151 | 49.6 | 76609  | 58.2 | 183958 | 76.5 |
| Yes                                                  | 298712  | 22.0 | 298712 | 50.4 | 54924  | 41.8 | 56413  | 23.5 |
| Hospitalization of obesity                           |         |      |        |      |        |      |        |      |
| No                                                   | 1338892 | 98.5 | 577543 | 97.4 | 128595 | 97.8 | 236644 | 98.4 |
| Yes                                                  | 19755   | 1.5  | 15320  | 2.6  | 2938   | 2.2  | 3727   | 1.6  |
| Hospitalization of chronic lower respiratory disease |         |      |        |      |        |      |        |      |
| No                                                   | 1288108 | 94.8 | 546393 | 92.2 | 120575 | 91.7 | 216522 | 90.1 |
| Yes                                                  | 70539   | 5.2  | 46470  | 7.8  | 10958  | 8.3  | 23849  | 9.9  |
| Cancer                                               |         |      |        |      |        |      |        |      |
| No                                                   | 1109571 | 81.7 | 452446 | 76.3 | 103202 | 78.5 | 139486 | 58.0 |
| Yes                                                  | 249076  | 18.3 | 140417 | 23.7 | 28331  | 21.5 | 100885 | 42.0 |
| Number of sibling                                    |         |      |        |      |        |      |        |      |
| Non sibling                                          | 214700  | 15.8 | 105516 | 17.8 | 23671  | 18.0 | 50709  | 21.1 |
| One sibling                                          | 443877  | 32.7 | 189839 | 32.0 | 39729  | 30.2 | 73140  | 30.4 |
| Two siblings                                         | 338812  | 24.9 | 140361 | 23.7 | 30184  | 22.9 | 52790  | 22.0 |
| Three siblings                                       | 183067  | 13.5 | 77378  | 13.1 | 17663  | 13.4 | 30266  | 12.6 |
| Four or more siblings                                | 178191  | 13.1 | 79769  | 13.5 | 20286  | 15.4 | 33466  | 13.9 |
| Birth order                                          |         |      |        |      |        |      |        |      |
| First                                                | 684765  | 50.4 | 318341 | 53.7 | 70238  | 53.4 | 140857 | 58.6 |
| Second                                               | 402879  | 29.7 | 166757 | 28.1 | 36654  | 27.9 | 62267  | 25.9 |
| Third                                                | 164540  | 12.1 | 65853  | 11.1 | 14736  | 11.2 | 23081  | 9.6  |
| Fourth                                               | 62765   | 4.6  | 24729  | 4.2  | 5737   | 4.4  | 8425   | 3.5  |
| Fifth+                                               | 43698   | 3.2  | 17183  | 2.9  | 4168   | 3.2  | 5741   | 2.4  |

**Supplementary Table 1b. Distribution of population, number of CVD, CHD, and mortality events in women.**

|                                                         | Population |      | CVD events |      | CHD events |      | Mortality events |      |
|---------------------------------------------------------|------------|------|------------|------|------------|------|------------------|------|
|                                                         | No.        | (%)  | No.        | %    | No.        | %    | No.              | %    |
| Total population (%)                                    | 1315037    |      | 486147     |      | 55933      |      | 160269           |      |
| Age (years)                                             |            |      |            |      |            |      |                  |      |
| 30-39                                                   | 507872     | 38.6 | 125326     | 25.8 | 9681       | 17.3 | 24571            | 15.3 |
| 40-49                                                   | 537035     | 40.8 | 210113     | 43.2 | 23738      | 42.4 | 64055            | 40.0 |
| 50+                                                     | 270130     | 20.5 | 150708     | 31.0 | 22514      | 40.3 | 71643            | 44.7 |
| Family income                                           |            |      |            |      |            |      |                  |      |
| Low income                                              | 343296     | 26.1 | 100542     | 20.7 | 10467      | 18.7 | 29723            | 18.5 |
| Middle–low income                                       | 340837     | 25.9 | 121716     | 25.0 | 13432      | 24.0 | 37773            | 23.6 |
| Middle–high income                                      | 347955     | 26.5 | 142924     | 29.4 | 17579      | 31.4 | 50537            | 31.5 |
| High income                                             | 282949     | 21.5 | 120965     | 24.9 | 14455      | 25.8 | 42236            | 26.4 |
| Marital status                                          |            |      |            |      |            |      |                  |      |
| Married/cohabiting                                      | 887258     | 67.5 | 331886     | 68.3 | 38106      | 68.1 | 96533            | 60.2 |
| Never married, Widowed, or divorced                     | 427779     | 32.5 | 154261     | 31.7 | 17827      | 31.9 | 63736            | 39.8 |
| Educational attainment                                  |            |      |            |      |            |      |                  |      |
| ≤ 9 years                                               | 232824     | 17.7 | 102037     | 21.0 | 15415      | 27.6 | 48455            | 30.2 |
| 10–11 years                                             | 165367     | 12.6 | 60209      | 12.4 | 6867       | 12.3 | 20489            | 12.8 |
| ≥ 12 years                                              | 916846     | 69.7 | 323901     | 66.6 | 33651      | 60.2 | 91325            | 57.0 |
| Immigrant status                                        |            |      |            |      |            |      |                  |      |
| Sweden                                                  | 1281472    | 97.4 | 476075     | 97.9 | 54756      | 97.9 | 157515           | 98.3 |
| Other countries                                         | 33565      | 2.6  | 10072      | 2.1  | 1177       | 2.1  | 2754             | 1.7  |
| Socioeconomic status                                    |            |      |            |      |            |      |                  |      |
| Farmers/self-employed/others                            | 272189     | 20.7 | 96279      | 19.8 | 12450      | 22.3 | 45553            | 28.4 |
| Blue collar workers                                     | 437324     | 33.3 | 174549     | 35.9 | 21821      | 39.0 | 55960            | 34.9 |
| White collar workers                                    | 496782     | 37.8 | 178249     | 36.7 | 18324      | 32.8 | 49169            | 30.7 |
| Professionals                                           | 108742     | 8.3  | 37070      | 7.6  | 3338       | 6.0  | 9587             | 6.0  |
| Urban/rural status                                      |            |      |            |      |            |      |                  |      |
| Large cities                                            | 495097     | 37.6 | 173872     | 35.8 | 17499      | 31.3 | 57794            | 36.1 |
| Southern Sweden                                         | 591636     | 45.0 | 223375     | 45.9 | 25965      | 46.4 | 72872            | 45.5 |
| Northern Sweden                                         | 228304     | 17.4 | 88900      | 18.3 | 12469      | 22.3 | 29603            | 18.5 |
| Hospitalization of alcoholism and related liver disease |            |      |            |      |            |      |                  |      |
| No                                                      | 1283561    | 97.6 | 471088     | 96.9 | 54416      | 97.3 | 149212           | 93.1 |
| Yes                                                     | 31476      | 2.4  | 15059      | 3.1  | 1517       | 2.7  | 11057            | 6.9  |
| Hospitalization of diabetes                             |            |      |            |      |            |      |                  |      |
| No                                                      | 1234361    | 93.9 | 429522     | 88.4 | 45537      | 81.4 | 139644           | 87.1 |

|                                                      |         |      |        |      |       |      |        |      |
|------------------------------------------------------|---------|------|--------|------|-------|------|--------|------|
| Yes                                                  | 80676   | 6.1  | 56625  | 11.6 | 10396 | 18.6 | 20625  | 12.9 |
| Hospitalization of hypertension                      |         |      |        |      |       |      |        |      |
| No                                                   | 1067928 | 81.2 | 239038 | 49.2 | 31364 | 56.1 | 124898 | 77.9 |
| Yes                                                  | 247109  | 18.8 | 247109 | 50.8 | 24569 | 43.9 | 35371  | 22.1 |
| Hospitalization of obesity                           |         |      |        |      |       |      |        |      |
| No                                                   | 1286838 | 97.9 | 468228 | 96.3 | 54003 | 96.5 | 156771 | 97.8 |
| Yes                                                  | 28199   | 2.1  | 17919  | 3.7  | 1930  | 3.5  | 3498   | 2.2  |
| Hospitalization of chronic lower respiratory disease |         |      |        |      |       |      |        |      |
| No                                                   | 1226846 | 93.3 | 433906 | 89.3 | 48084 | 86.0 | 137028 | 85.5 |
| Yes                                                  | 88191   | 6.7  | 52241  | 10.7 | 7849  | 14.0 | 23241  | 14.5 |
| Cancer                                               |         |      |        |      |       |      |        |      |
| No                                                   | 1051617 | 80.0 | 364226 | 74.9 | 43617 | 78.0 | 70300  | 43.9 |
| Yes                                                  | 263420  | 20.0 | 121921 | 25.1 | 12316 | 22.0 | 89969  | 56.1 |
| Number of sibling                                    |         |      |        |      |       |      |        |      |
| Non sibling                                          | 210121  | 16.0 | 87261  | 17.9 | 10289 | 18.4 | 34521  | 21.5 |
| One sibling                                          | 430315  | 32.7 | 154154 | 31.7 | 16280 | 29.1 | 49132  | 30.7 |
| Two siblings                                         | 324379  | 24.7 | 113739 | 23.4 | 12500 | 22.3 | 34843  | 21.7 |
| Three siblings                                       | 176631  | 13.4 | 63871  | 13.1 | 7512  | 13.4 | 19766  | 12.3 |
| Four or more siblings                                | 173591  | 13.2 | 67122  | 13.8 | 9352  | 16.7 | 22007  | 13.7 |
| Birth order                                          |         |      |        |      |       |      |        |      |
| First                                                | 664459  | 50.5 | 262015 | 53.9 | 30342 | 54.2 | 94779  | 59.1 |
| Second                                               | 388391  | 29.5 | 136263 | 28.0 | 15191 | 27.2 | 40984  | 25.6 |
| Third                                                | 159311  | 12.1 | 53711  | 11.0 | 6231  | 11.1 | 15205  | 9.5  |
| Fourth                                               | 60676   | 4.6  | 20264  | 4.2  | 2379  | 4.3  | 5558   | 3.5  |
| Fifth+                                               | 42200   | 3.2  | 13894  | 2.9  | 1790  | 3.2  | 3743   | 2.3  |

**Supplementary Table 2a. Hazard ratio (HR) and 95% confidence interval of CVD in men, using multivariable competing risk survival analysis**

|                                                                     | Model 1 |        |      | Model 2 |        |      | Model 3 |        |      |
|---------------------------------------------------------------------|---------|--------|------|---------|--------|------|---------|--------|------|
|                                                                     | HR*     | 95% CI |      | HR*     | 95% CI |      | HR*     | 95% CI |      |
| Number of siblings (ref. No sibling)                                |         |        |      |         |        |      |         |        |      |
| One sibling                                                         | 0.97    | 0.97   | 0.98 | 0.98    | 0.97   | 0.98 | 0.98    | 0.97   | 0.99 |
| Two siblings                                                        | 0.97    | 0.96   | 0.98 | 0.97    | 0.96   | 0.97 | 0.97    | 0.97   | 0.98 |
| Three siblings                                                      | 0.99    | 0.98   | 1.00 | 0.98    | 0.97   | 0.99 | 0.98    | 0.97   | 0.99 |
| Four or more children                                               | 1.04    | 1.03   | 1.05 | 1.00    | 0.99   | 1.01 | 1.00    | 0.99   | 1.01 |
| Age (years)                                                         | 1.07    | 1.07   | 1.07 | 1.08    | 1.07   | 1.08 | 1.06    | 1.06   | 1.06 |
| Family income (ref. High)                                           |         |        |      |         |        |      |         |        |      |
| Low income                                                          |         |        |      | 0.92    | 0.92   | 0.93 | 0.99    | 0.98   | 1.00 |
| Middle–low income                                                   |         |        |      | 1.02    | 1.01   | 1.03 | 1.05    | 1.04   | 1.06 |
| Middle–high income                                                  |         |        |      | 1.04    | 1.03   | 1.05 | 1.05    | 1.04   | 1.06 |
| Educational level (ref. > 12 years)                                 |         |        |      |         |        |      |         |        |      |
| 10–11 years                                                         |         |        |      | 1.11    | 1.10   | 1.12 | 1.06    | 1.05   | 1.07 |
| ≥ 12 years                                                          |         |        |      | 1.00    | 1.00   | 1.01 | 1.00    | 0.99   | 1.00 |
| Socioeconomic status (ref. professionals)                           |         |        |      |         |        |      |         |        |      |
| Farmers/self-employed/others                                        |         |        |      | 1.22    | 1.21   | 1.23 | 1.17    | 1.16   | 1.18 |
| Blue collar workers                                                 |         |        |      | 1.15    | 1.14   | 1.16 | 1.09    | 1.08   | 1.10 |
| White collar workers                                                |         |        |      | 1.08    | 1.07   | 1.08 | 1.04    | 1.04   | 1.05 |
| Region of residence (ref. Large cities)                             |         |        |      |         |        |      |         |        |      |
| Southern Sweden                                                     |         |        |      | 1.00    | 1.00   | 1.01 | 1.03    | 1.02   | 1.03 |
| Northern Sweden                                                     |         |        |      | 1.04    | 1.03   | 1.05 | 1.05    | 1.04   | 1.06 |
| Immigrant status (ref. Born in Sweden)                              |         |        |      | 0.95    | 0.93   | 0.97 | 0.96    | 0.95   | 0.98 |
| Marital status (ref. Not married)                                   |         |        |      | 1.18    | 1.17   | 1.19 | 1.17    | 1.16   | 1.18 |
| Birth order                                                         |         |        |      | 1.01    | 1.01   | 1.01 | 1.01    | 1.01   | 1.02 |
| Hospitalization of chronic lower respiratory disease (ref. Non)     |         |        |      |         |        |      | 1.26    | 1.25   | 1.28 |
| Hospitalization of alcoholisms and related liver disease (ref. Non) |         |        |      |         |        |      | 1.74    | 1.73   | 1.76 |
| Hospitalization of diabetes (ref. Non)                              |         |        |      |         |        |      | 1.39    | 1.38   | 1.40 |
| Hospitalization of obesity (ref. Non)                               |         |        |      |         |        |      | 1.37    | 1.35   | 1.40 |
| Hospitalization of hypertension (ref. Non)                          |         |        |      |         |        |      | 3.72    | 3.70   | 3.74 |
| Cancer (ref. Non)                                                   |         |        |      |         |        |      | 1.36    | 1.35   | 1.36 |

Model 1. Adjusted for age at start; Model 2. Adjusted for age at start and individual characteristics; Model 3. Model 2 + comorbidities.

\*: Multivariable competing risk survival analysis

**Supplementary Table 2b. Hazard ratio (HR) and 95% confidence interval of CVD in men, using multivariable competing risk survival analysis**

|                                                                     | Model 1 |        |      | Model 2 |        |      | Model 3 |        |      |
|---------------------------------------------------------------------|---------|--------|------|---------|--------|------|---------|--------|------|
|                                                                     | HR*     | 95% CI |      | HR*     | 95% CI |      | HR*     | 95% CI |      |
| Birth order (ref. First birth)                                      |         |        |      |         |        |      |         |        |      |
| Second                                                              | 0.99    | 0.99   | 1.00 | 0.99    | 0.98   | 1.00 | 1.00    | 1.00   | 1.01 |
| Third                                                               | 1.02    | 1.01   | 1.03 | 1.01    | 1.00   | 1.02 | 1.02    | 1.02   | 1.03 |
| Fourth                                                              | 1.05    | 1.03   | 1.06 | 1.03    | 1.01   | 1.04 | 1.04    | 1.02   | 1.05 |
| Fifth+                                                              | 1.10    | 1.08   | 1.12 | 1.07    | 1.05   | 1.08 | 1.07    | 1.05   | 1.09 |
| Age (years)                                                         | 1.07    | 1.07   | 1.07 | 1.08    | 1.07   | 1.08 | 1.06    | 1.06   | 1.06 |
| Family income (ref. High)                                           |         |        |      |         |        |      |         |        |      |
| Low income                                                          |         |        |      | 0.92    | 0.92   | 0.93 | 0.99    | 0.98   | 1.00 |
| Middle–low income                                                   |         |        |      | 1.02    | 1.01   | 1.03 | 1.05    | 1.04   | 1.06 |
| Middle–high income                                                  |         |        |      | 1.04    | 1.03   | 1.05 | 1.05    | 1.04   | 1.06 |
| Educational level (ref. > 12 years)                                 |         |        |      |         |        |      |         |        |      |
| 10–11 years                                                         |         |        |      | 1.11    | 1.10   | 1.12 | 1.06    | 1.05   | 1.07 |
| ≥ 12 years                                                          |         |        |      | 1.00    | 1.00   | 1.01 | 1.00    | 0.99   | 1.00 |
| Socioeconomic status (ref. professionals)                           |         |        |      |         |        |      |         |        |      |
| Farmers/self-employed/others                                        |         |        |      | 1.22    | 1.21   | 1.23 | 1.17    | 1.16   | 1.18 |
| Blue collar workers                                                 |         |        |      | 1.15    | 1.14   | 1.16 | 1.09    | 1.08   | 1.10 |
| White collar workers                                                |         |        |      | 1.08    | 1.07   | 1.08 | 1.04    | 1.04   | 1.05 |
| Region of residence (ref. Large cities)                             |         |        |      |         |        |      |         |        |      |
| Southern Sweden                                                     |         |        |      | 1.00    | 1.00   | 1.01 | 1.03    | 1.02   | 1.03 |
| Northern Sweden                                                     |         |        |      | 1.04    | 1.03   | 1.05 | 1.05    | 1.04   | 1.06 |
| Immigrant status (ref. Born in Sweden)                              |         |        |      | 0.95    | 0.93   | 0.97 | 0.97    | 0.95   | 0.98 |
| Marital status (ref. Not married)                                   |         |        |      | 1.18    | 1.17   | 1.19 | 1.17    | 1.16   | 1.18 |
| Number of siblings                                                  |         |        |      | 1.00    | 1.00   | 1.00 | 1.00    | 1.00   | 1.00 |
| Hospitalization of chronic lower respiratory disease (ref. Non)     |         |        |      |         |        |      | 1.26    | 1.25   | 1.28 |
| Hospitalization of alcoholisms and related liver disease (ref. Non) |         |        |      |         |        |      | 1.74    | 1.73   | 1.76 |
| Hospitalization of diabetes (ref. Non)                              |         |        |      |         |        |      | 1.39    | 1.38   | 1.40 |
| Hospitalization of obesity (ref. Non)                               |         |        |      |         |        |      | 1.37    | 1.35   | 1.40 |
| Hospitalization of hypertension (ref. Non)                          |         |        |      |         |        |      | 3.72    | 3.70   | 3.74 |
| Cancer (ref. Non)                                                   |         |        |      |         |        |      | 1.36    | 1.35   | 1.36 |

Model 1. Adjusted for age at start; Model 2. Adjusted for age at start and individual characteristics; Model 3. Model 2 + comorbidities.

\*: Multivariable competing risk survival analysis

**Supplementary Table 2c. Hazard ratio (HR) and 95% confidence interval of CVD in women, using multivariable competing risk survival analysis**

|                                                                     | Model 1 |        |      | Model 2 |        |      | Model 3 |        |      |
|---------------------------------------------------------------------|---------|--------|------|---------|--------|------|---------|--------|------|
|                                                                     | HR*     | 95% CI |      | HR*     | 95% CI |      | HR*     | 95% CI |      |
| Number of siblings (ref. No sibling)                                |         |        |      |         |        |      |         |        |      |
| One sibling                                                         | 0.98    | 0.97   | 0.98 | 0.98    | 0.97   | 0.98 | 0.98    | 0.98   | 0.99 |
| Two siblings                                                        | 0.99    | 0.98   | 0.99 | 0.98    | 0.97   | 0.99 | 0.99    | 0.98   | 1.00 |
| Three siblings                                                      | 1.01    | 1.00   | 1.02 | 1.00    | 0.99   | 1.01 | 1.00    | 0.99   | 1.01 |
| Four or more children                                               | 1.06    | 1.05   | 1.07 | 1.03    | 1.02   | 1.04 | 1.01    | 1.00   | 1.03 |
| Age (years)                                                         | 1.06    | 1.06   | 1.07 | 1.06    | 1.06   | 1.06 | 1.04    | 1.04   | 1.04 |
| Family income (ref. High)                                           |         |        |      |         |        |      |         |        |      |
| Low income                                                          |         |        |      | 0.87    | 0.86   | 0.87 | 0.95    | 0.94   | 0.96 |
| Middle–low income                                                   |         |        |      | 1.01    | 1.00   | 1.02 | 1.04    | 1.03   | 1.05 |
| Middle–high income                                                  |         |        |      | 1.02    | 1.01   | 1.03 | 1.03    | 1.02   | 1.03 |
| Educational level (ref. > 12 years)                                 |         |        |      |         |        |      |         |        |      |
| 10–11 years                                                         |         |        |      | 1.13    | 1.12   | 1.14 | 1.08    | 1.06   | 1.09 |
| ≥ 12 years                                                          |         |        |      | 1.04    | 1.03   | 1.05 | 1.03    | 1.02   | 1.04 |
| Socioeconomic status (ref. professionals)                           |         |        |      |         |        |      |         |        |      |
| Farmers/self-employed/others                                        |         |        |      | 1.30    | 1.28   | 1.31 | 1.20    | 1.19   | 1.22 |
| Blue collar workers                                                 |         |        |      | 1.25    | 1.24   | 1.27 | 1.12    | 1.11   | 1.13 |
| White collar workers                                                |         |        |      | 1.08    | 1.07   | 1.10 | 1.03    | 1.02   | 1.04 |
| Region of residence (ref. Large cities)                             |         |        |      |         |        |      |         |        |      |
| Southern Sweden                                                     |         |        |      | 1.03    | 1.03   | 1.04 | 1.03    | 1.03   | 1.04 |
| Northern Sweden                                                     |         |        |      | 1.06    | 1.06   | 1.07 | 1.04    | 1.03   | 1.05 |
| Immigrant status (ref. Born in Sweden)                              |         |        |      | 0.97    | 0.96   | 0.99 | 0.98    | 0.96   | 1.00 |
| Marital status (ref. Not married)                                   |         |        |      | 1.13    | 1.12   | 1.14 | 1.10    | 1.09   | 1.11 |
| Birth order                                                         |         |        |      | 1.00    | 1.00   | 1.01 | 1.01    | 1.01   | 1.01 |
| Hospitalization of chronic lower respiratory disease (ref. Non)     |         |        |      |         |        |      | 1.38    | 1.36   | 1.39 |
| Hospitalization of alcoholisms and related liver disease (ref. Non) |         |        |      |         |        |      | 1.67    | 1.65   | 1.69 |
| Hospitalization of diabetes (ref. Non)                              |         |        |      |         |        |      | 1.38    | 1.37   | 1.39 |
| Hospitalization of obesity (ref. Non)                               |         |        |      |         |        |      | 1.32    | 1.30   | 1.34 |
| Hospitalization of hypertension (ref. Non)                          |         |        |      |         |        |      | 4.86    | 4.83   | 4.89 |
| Cancer (ref. Non)                                                   |         |        |      |         |        |      | 1.62    | 1.61   | 1.63 |

Model 1. Adjusted for age at start; Model 2. Adjusted for age at start and individual characteristics; Model 3. Model 2 + comorbidities.

\*: Multivariable competing risk survival analysis

**Supplementary Table 2d. Hazard ratio (HR) and 95% confidence interval of CVD in women, using multivariable competing risk survival analysis**

|                                                                     | Model 1 |        |      | Model 2 |        |      | Model 3 |        |      |
|---------------------------------------------------------------------|---------|--------|------|---------|--------|------|---------|--------|------|
|                                                                     | HR*     | 95% CI |      | HR*     | 95% CI |      | HR*     | 95% CI |      |
| Birth order (ref. First birth)                                      |         |        |      |         |        |      |         |        |      |
| Second                                                              | 1.00    | 0.99   | 1.01 | 0.99    | 0.98   | 1.00 | 1.01    | 1.00   | 1.02 |
| Third                                                               | 1.03    | 1.02   | 1.04 | 1.00    | 0.99   | 1.01 | 1.02    | 1.01   | 1.03 |
| Fourth                                                              | 1.06    | 1.04   | 1.07 | 1.01    | 1.00   | 1.03 | 1.04    | 1.02   | 1.05 |
| Fifth+                                                              | 1.09    | 1.07   | 1.10 | 1.01    | 0.99   | 1.03 | 1.05    | 1.03   | 1.07 |
| Age (years)                                                         | 1.07    | 1.07   | 1.07 | 1.06    | 1.06   | 1.06 | 1.04    | 1.04   | 1.04 |
| Family income (ref. High)                                           |         |        |      |         |        |      |         |        |      |
| Low income                                                          |         |        |      | 0.87    | 0.86   | 0.87 | 0.95    | 0.94   | 0.96 |
| Middle–low income                                                   |         |        |      | 1.01    | 1.00   | 1.02 | 1.04    | 1.03   | 1.05 |
| Middle–high income                                                  |         |        |      | 1.02    | 1.01   | 1.03 | 1.03    | 1.02   | 1.03 |
| Educational level (ref. > 12 years)                                 |         |        |      |         |        |      |         |        |      |
| 10–11 years                                                         |         |        |      | 1.13    | 1.12   | 1.14 | 1.08    | 1.06   | 1.09 |
| ≥ 12 years                                                          |         |        |      | 1.04    | 1.03   | 1.05 | 1.03    | 1.02   | 1.04 |
| Socioeconomic status (ref. professionals)                           |         |        |      |         |        |      |         |        |      |
| Farmers/self-employed/others                                        |         |        |      | 1.30    | 1.28   | 1.31 | 1.21    | 1.19   | 1.22 |
| Blue collar workers                                                 |         |        |      | 1.26    | 1.24   | 1.27 | 1.12    | 1.11   | 1.13 |
| White collar workers                                                |         |        |      | 1.09    | 1.07   | 1.10 | 1.03    | 1.02   | 1.05 |
| Region of residence (ref. Large cities)                             |         |        |      |         |        |      |         |        |      |
| Southern Sweden                                                     |         |        |      | 1.03    | 1.03   | 1.04 | 1.03    | 1.03   | 1.04 |
| Northern Sweden                                                     |         |        |      | 1.06    | 1.06   | 1.07 | 1.04    | 1.03   | 1.05 |
| Immigrant status (ref. Born in Sweden)                              |         |        |      | 0.97    | 0.96   | 0.99 | 0.98    | 0.96   | 1.00 |
| Marital status (ref. Not married)                                   |         |        |      | 1.13    | 1.13   | 1.14 | 1.10    | 1.09   | 1.11 |
| Number of siblings                                                  |         |        |      | 1.01    | 1.01   | 1.01 | 1.00    | 1.00   | 1.01 |
| Hospitalization of chronic lower respiratory disease (ref. Non)     |         |        |      |         |        |      | 1.38    | 1.36   | 1.39 |
| Hospitalization of alcoholisms and related liver disease (ref. Non) |         |        |      |         |        |      | 1.67    | 1.65   | 1.69 |
| Hospitalization of diabetes (ref. Non)                              |         |        |      |         |        |      | 1.38    | 1.37   | 1.39 |
| Hospitalization of obesity (ref. Non)                               |         |        |      |         |        |      | 1.32    | 1.30   | 1.34 |
| Hospitalization of hypertension (ref. Non)                          |         |        |      |         |        |      | 4.86    | 4.83   | 4.89 |
| Cancer (ref. Non)                                                   |         |        |      |         |        |      | 1.62    | 1.61   | 1.63 |

Model 1. Adjusted for age at start; Model 2. Adjusted for age at start and individual characteristics; Model 3. Model 2 + comorbidities.

\*: Multivariable competing risk survival analysis



**Supplementary Table 3a. Hazard ratio (HR) and 95% confidence interval of CHD in men**

|                                                                     | Model 1 |           |  | Model 2 |           |  | Model 3 |           |  |
|---------------------------------------------------------------------|---------|-----------|--|---------|-----------|--|---------|-----------|--|
|                                                                     | HR      | 95% CI    |  | HR      | 95% CI    |  | HR      | 95% CI    |  |
| Number of siblings (ref. No sibling)                                |         |           |  |         |           |  |         |           |  |
| One sibling                                                         | 1.00    | 0.98 1.02 |  | 0.99    | 0.97 1.01 |  | 0.99    | 0.97 1.01 |  |
| Two siblings                                                        | 1.04    | 1.03 1.06 |  | 1.00    | 0.98 1.02 |  | 1.01    | 0.99 1.03 |  |
| Three siblings                                                      | 1.12    | 1.10 1.14 |  | 1.04    | 1.02 1.06 |  | 1.04    | 1.02 1.07 |  |
| Four or more children                                               | 1.27    | 1.25 1.30 |  | 1.10    | 1.08 1.12 |  | 1.10    | 1.07 1.12 |  |
| Age (years)                                                         | 1.08    | 1.08 1.08 |  | 1.08    | 1.08 1.08 |  | 1.07    | 1.07 1.07 |  |
| Family income (ref. High)                                           |         |           |  |         |           |  |         |           |  |
| Low income                                                          |         |           |  | 0.93    | 0.91 0.94 |  | 0.96    | 0.95 0.98 |  |
| Middle–low income                                                   |         |           |  | 1.00    | 0.98 1.01 |  | 1.02    | 1.00 1.03 |  |
| Middle–high income                                                  |         |           |  | 1.01    | 1.00 1.03 |  | 1.02    | 1.00 1.03 |  |
| Educational level (ref. > 12 years)                                 |         |           |  |         |           |  |         |           |  |
| 10–11 years                                                         |         |           |  | 1.05    | 1.03 1.07 |  | 1.04    | 1.02 1.07 |  |
| ≥ 12 years                                                          |         |           |  | 0.94    | 0.93 0.95 |  | 0.95    | 0.94 0.96 |  |
| Socioeconomic status (ref. professionals)                           |         |           |  |         |           |  |         |           |  |
| Farmers/self-employed/others                                        |         |           |  | 1.23    | 1.20 1.25 |  | 1.18    | 1.16 1.21 |  |
| Blue collar workers                                                 |         |           |  | 1.26    | 1.24 1.28 |  | 1.21    | 1.19 1.23 |  |
| White collar workers                                                |         |           |  | 1.18    | 1.16 1.20 |  | 1.15    | 1.13 1.17 |  |
| Region of residence (ref. Large cities)                             |         |           |  |         |           |  |         |           |  |
| Southern Sweden                                                     |         |           |  | 1.11    | 1.10 1.12 |  | 1.12    | 1.11 1.14 |  |
| Northern Sweden                                                     |         |           |  | 1.32    | 1.30 1.34 |  | 1.31    | 1.29 1.33 |  |
| Immigrant status (ref. Born in Sweden)                              |         |           |  | 1.09    | 1.05 1.13 |  | 1.10    | 1.06 1.14 |  |
| Marital status (ref. Not married)                                   |         |           |  | 1.00    | 0.99 1.01 |  | 0.99    | 0.98 1.01 |  |
| Birth order                                                         |         |           |  | 1.05    | 1.04 1.05 |  | 1.05    | 1.05 1.06 |  |
| Hospitalization of chronic lower respiratory disease (ref. Non)     |         |           |  |         |           |  | 1.29    | 1.26 1.31 |  |
| Hospitalization of alcoholisms and related liver disease (ref. Non) |         |           |  |         |           |  | 1.01    | 0.99 1.04 |  |
| Hospitalization of diabetes (ref. Non)                              |         |           |  |         |           |  | 1.75    | 1.73 1.78 |  |
| Hospitalization of obesity (ref. Non)                               |         |           |  |         |           |  | 1.13    | 1.09 1.17 |  |
| Hospitalization of hypertension (ref. Non)                          |         |           |  |         |           |  | 1.86    | 1.84 1.88 |  |
| Cancer (ref. Non)                                                   |         |           |  |         |           |  | 0.91    | 0.89 0.92 |  |

Model 1. Adjusted for age at start; Model 2. Adjusted for age at start and individual characteristics; Model 3. Model 2 + comorbidities.

**Supplementary Table 3b. Hazard ratio (HR) and 95% confidence interval of CHD in men**

|                                                                     | Model 1 |        |      | Model 2 |        |      | Model 3 |        |      |
|---------------------------------------------------------------------|---------|--------|------|---------|--------|------|---------|--------|------|
|                                                                     | HR      | 95% CI |      | HR      | 95% CI |      | HR      | 95% CI |      |
| Birth order (ref. First birth)                                      |         |        |      |         |        |      |         |        |      |
| Second                                                              | 1.09    | 1.08   | 1.10 | 1.06    | 1.05   | 1.07 | 1.08    | 1.06   | 1.09 |
| Third                                                               | 1.19    | 1.17   | 1.21 | 1.11    | 1.09   | 1.13 | 1.13    | 1.11   | 1.15 |
| Fourth                                                              | 1.28    | 1.25   | 1.32 | 1.15    | 1.12   | 1.19 | 1.17    | 1.14   | 1.21 |
| Fifth+                                                              | 1.44    | 1.39   | 1.48 | 1.22    | 1.17   | 1.26 | 1.23    | 1.19   | 1.28 |
| Age (years)                                                         | 1.08    | 1.08   | 1.09 | 1.08    | 1.08   | 1.08 | 1.07    | 1.07   | 1.07 |
| Family income (ref. High)                                           |         |        |      |         |        |      |         |        |      |
| Low income                                                          |         |        |      | 0.93    | 0.91   | 0.94 | 0.96    | 0.95   | 0.98 |
| Middle–low income                                                   |         |        |      | 1.00    | 0.98   | 1.01 | 1.02    | 1.00   | 1.03 |
| Middle–high income                                                  |         |        |      | 1.01    | 1.00   | 1.02 | 1.02    | 1.00   | 1.03 |
| Educational level (ref. > 12 years)                                 |         |        |      |         |        |      |         |        |      |
| 10–11 years                                                         |         |        |      | 1.05    | 1.03   | 1.08 | 1.05    | 1.03   | 1.07 |
| ≥ 12 years                                                          |         |        |      | 0.94    | 0.93   | 0.95 | 0.95    | 0.94   | 0.97 |
| Socioeconomic status (ref. professionals)                           |         |        |      |         |        |      |         |        |      |
| Farmers/self-employed/others                                        |         |        |      | 1.23    | 1.20   | 1.25 | 1.18    | 1.16   | 1.21 |
| Blue collar workers                                                 |         |        |      | 1.26    | 1.24   | 1.28 | 1.21    | 1.19   | 1.23 |
| White collar workers                                                |         |        |      | 1.18    | 1.16   | 1.20 | 1.15    | 1.13   | 1.17 |
| Region of residence (ref. Large cities)                             |         |        |      |         |        |      |         |        |      |
| Southern Sweden                                                     |         |        |      | 1.11    | 1.10   | 1.13 | 1.12    | 1.11   | 1.14 |
| Northern Sweden                                                     |         |        |      | 1.32    | 1.30   | 1.34 | 1.31    | 1.29   | 1.33 |
| Immigrant status (ref. Born in Sweden)                              |         |        |      | 1.09    | 1.05   | 1.13 | 1.10    | 1.06   | 1.14 |
| Marital status (ref. Not married)                                   |         |        |      | 1.00    | 0.99   | 1.01 | 0.99    | 0.98   | 1.01 |
| Number of siblings                                                  |         |        |      | 1.02    | 1.02   | 1.02 | 1.02    | 1.02   | 1.02 |
| Hospitalization of chronic lower respiratory disease (ref. Non)     |         |        |      |         |        |      | 1.29    | 1.26   | 1.31 |
| Hospitalization of alcoholisms and related liver disease (ref. Non) |         |        |      |         |        |      | 1.01    | 0.99   | 1.04 |
| Hospitalization of diabetes (ref. Non)                              |         |        |      |         |        |      | 1.75    | 1.73   | 1.78 |
| Hospitalization of obesity (ref. Non)                               |         |        |      |         |        |      | 1.13    | 1.09   | 1.17 |
| Hospitalization of hypertension (ref. Non)                          |         |        |      |         |        |      | 1.86    | 1.84   | 1.88 |
| Cancer (ref. Non)                                                   |         |        |      |         |        |      | 0.91    | 0.89   | 0.92 |

Model 1. Adjusted for age at start; Model 2. Adjusted for age at start and individual characteristics; Model 3. Model 2 + comorbidities.

**Supplementary Table 3c. Hazard ratio (HR) and 95% confidence interval of CHD in women**

|                                                                     | Model 1 |        |      | Model 2 |        |      | Model 3 |        |      |
|---------------------------------------------------------------------|---------|--------|------|---------|--------|------|---------|--------|------|
|                                                                     | HR      | 95% CI |      | HR      | 95% CI |      | HR      | 95% CI |      |
| Number of siblings (ref. No sibling)                                |         |        |      |         |        |      |         |        |      |
| One sibling                                                         | 0.99    | 0.97   | 1.02 | 0.98    | 0.96   | 1.01 | 0.99    | 0.97   | 1.02 |
| Two siblings                                                        | 1.07    | 1.04   | 1.10 | 1.03    | 1.00   | 1.05 | 1.03    | 1.00   | 1.06 |
| Three siblings                                                      | 1.17    | 1.13   | 1.20 | 1.08    | 1.04   | 1.11 | 1.07    | 1.04   | 1.11 |
| Four or more children                                               | 1.40    | 1.36   | 1.44 | 1.20    | 1.16   | 1.24 | 1.17    | 1.13   | 1.21 |
| Age (years)                                                         | 1.09    | 1.09   | 1.09 | 1.09    | 1.08   | 1.09 | 1.07    | 1.07   | 1.07 |
| Family income (ref. High)                                           |         |        |      |         |        |      |         |        |      |
| Low income                                                          |         |        |      | 0.85    | 0.83   | 0.88 | 0.91    | 0.88   | 0.93 |
| Middle–low income                                                   |         |        |      | 1.00    | 0.98   | 1.03 | 1.00    | 0.98   | 1.03 |
| Middle–high income                                                  |         |        |      | 1.02    | 1.00   | 1.05 | 1.02    | 0.99   | 1.04 |
| Educational level (ref. > 12 years)                                 |         |        |      |         |        |      |         |        |      |
| 10–11 years                                                         |         |        |      | 1.07    | 1.04   | 1.10 | 1.06    | 1.03   | 1.09 |
| ≥ 12 years                                                          |         |        |      | 0.92    | 0.90   | 0.94 | 0.94    | 0.92   | 0.96 |
| Socioeconomic status (ref. professionals)                           |         |        |      |         |        |      |         |        |      |
| Farmers/self-employed/others                                        |         |        |      | 1.52    | 1.46   | 1.59 | 1.37    | 1.31   | 1.42 |
| Blue collar workers                                                 |         |        |      | 1.47    | 1.42   | 1.53 | 1.33    | 1.28   | 1.38 |
| White collar workers                                                |         |        |      | 1.19    | 1.14   | 1.23 | 1.14    | 1.10   | 1.18 |
| Region of residence (ref. Large cities)                             |         |        |      |         |        |      |         |        |      |
| Southern Sweden                                                     |         |        |      | 1.14    | 1.12   | 1.16 | 1.15    | 1.13   | 1.17 |
| Northern Sweden                                                     |         |        |      | 1.40    | 1.37   | 1.44 | 1.38    | 1.34   | 1.41 |
| Immigrant status (ref. Born in Sweden)                              |         |        |      | 1.13    | 1.07   | 1.20 | 1.13    | 1.07   | 1.20 |
| Marital status (ref. Not married)                                   |         |        |      | 1.12    | 1.10   | 1.14 | 1.08    | 1.06   | 1.10 |
| Birth order                                                         |         |        |      | 1.04    | 1.03   | 1.05 | 1.05    | 1.04   | 1.06 |
| Hospitalization of chronic lower respiratory disease (ref. Non)     |         |        |      |         |        |      | 1.69    | 1.65   | 1.73 |
| Hospitalization of alcoholisms and related liver disease (ref. Non) |         |        |      |         |        |      | 1.17    | 1.11   | 1.23 |
| Hospitalization of diabetes (ref. Non)                              |         |        |      |         |        |      | 2.20    | 2.15   | 2.25 |
| Hospitalization of obesity (ref. Non)                               |         |        |      |         |        |      | 1.11    | 1.06   | 1.17 |
| Hospitalization of hypertension (ref. Non)                          |         |        |      |         |        |      | 2.22    | 2.18   | 2.26 |
| Cancer (ref. Non)                                                   |         |        |      |         |        |      | 0.94    | 0.93   | 0.96 |

Model 1. Adjusted for age at start; Model 2. Adjusted for age at start and individual characteristics; Model 3. Model 2 + comorbidities.

**Supplementary Table 3d. Hazard ratio (HR) and 95% confidence interval of CHD in women**

|                                                                     | Model 1 |        |      | Model 2 |        |      | Model 3 |        |      |
|---------------------------------------------------------------------|---------|--------|------|---------|--------|------|---------|--------|------|
|                                                                     | HR      | 95% CI |      | HR      | 95% CI |      | HR      | 95% CI |      |
| Birth order (ref. First birth)                                      |         |        |      |         |        |      |         |        |      |
| Second                                                              | 1.10    | 1.07   | 1.12 | 1.05    | 1.02   | 1.07 | 1.07    | 1.05   | 1.09 |
| Third                                                               | 1.24    | 1.21   | 1.28 | 1.11    | 1.08   | 1.14 | 1.14    | 1.11   | 1.18 |
| Fourth                                                              | 1.33    | 1.27   | 1.38 | 1.11    | 1.06   | 1.16 | 1.14    | 1.09   | 1.20 |
| Fifth+                                                              | 1.56    | 1.48   | 1.63 | 1.17    | 1.11   | 1.24 | 1.22    | 1.15   | 1.29 |
| Age (years)                                                         | 1.09    | 1.09   | 1.09 | 1.09    | 1.08   | 1.09 | 1.07    | 1.07   | 1.07 |
| Family income (ref. High)                                           |         |        |      |         |        |      |         |        |      |
| Low income                                                          |         |        |      | 0.85    | 0.83   | 0.88 | 0.91    | 0.88   | 0.93 |
| Middle–low income                                                   |         |        |      | 1.00    | 0.98   | 1.03 | 1.01    | 0.98   | 1.03 |
| Middle–high income                                                  |         |        |      | 1.02    | 1.00   | 1.05 | 1.02    | 0.99   | 1.04 |
| Educational level (ref. > 12 years)                                 |         |        |      |         |        |      |         |        |      |
| 10–11 years                                                         |         |        |      | 1.07    | 1.04   | 1.10 | 1.06    | 1.03   | 1.09 |
| ≥ 12 years                                                          |         |        |      | 0.92    | 0.90   | 0.94 | 0.94    | 0.92   | 0.96 |
| Socioeconomic status (ref. professionals)                           |         |        |      |         |        |      |         |        |      |
| Farmers/self-employed/others                                        |         |        |      | 1.52    | 1.46   | 1.59 | 1.37    | 1.31   | 1.42 |
| Blue collar workers                                                 |         |        |      | 1.47    | 1.42   | 1.53 | 1.33    | 1.28   | 1.38 |
| White collar workers                                                |         |        |      | 1.19    | 1.14   | 1.23 | 1.14    | 1.10   | 1.18 |
| Region of residence (ref. Large cities)                             |         |        |      |         |        |      |         |        |      |
| Southern Sweden                                                     |         |        |      | 1.14    | 1.12   | 1.17 | 1.15    | 1.13   | 1.17 |
| Northern Sweden                                                     |         |        |      | 1.40    | 1.37   | 1.44 | 1.38    | 1.34   | 1.41 |
| Immigrant status (ref. Born in Sweden)                              |         |        |      | 1.13    | 1.07   | 1.20 | 1.13    | 1.07   | 1.20 |
| Marital status (ref. Not married)                                   |         |        |      | 1.12    | 1.10   | 1.14 | 1.08    | 1.06   | 1.10 |
| Number of siblings                                                  |         |        |      | 1.04    | 1.03   | 1.04 | 1.03    | 1.03   | 1.04 |
| Hospitalization of chronic lower respiratory disease (ref. Non)     |         |        |      |         |        |      | 1.69    | 1.65   | 1.73 |
| Hospitalization of alcoholisms and related liver disease (ref. Non) |         |        |      |         |        |      | 1.17    | 1.11   | 1.23 |
| Hospitalization of diabetes (ref. Non)                              |         |        |      |         |        |      | 2.20    | 2.15   | 2.25 |
| Hospitalization of obesity (ref. Non)                               |         |        |      |         |        |      | 1.11    | 1.06   | 1.17 |
| Hospitalization of hypertension (ref. Non)                          |         |        |      |         |        |      | 2.22    | 2.18   | 2.26 |
| Cancer (ref. Non)                                                   |         |        |      |         |        |      | 0.94    | 0.93   | 0.96 |

Model 1. Adjusted for age at start; Model 2. Adjusted for age at start and individual characteristics; Model 3. Model 2 + comorbidities.

**Supplementary Table 4a. Hazard ratio (HR) and 95% confidence interval of mortality in men**

|                                                                     | Model 1 |        |      | Model 2 |        |      | Model 3 |        |      |
|---------------------------------------------------------------------|---------|--------|------|---------|--------|------|---------|--------|------|
|                                                                     | HR      | 95% CI |      | HR      | 95% CI |      | HR      | 95% CI |      |
| Number of siblings (ref. No sibling)                                |         |        |      |         |        |      |         |        |      |
| One sibling                                                         | 0.91    | 0.90   | 0.92 | 0.92    | 0.91   | 0.93 | 0.93    | 0.92   | 0.94 |
| Two siblings                                                        | 0.92    | 0.91   | 0.93 | 0.91    | 0.90   | 0.92 | 0.91    | 0.90   | 0.92 |
| Three siblings                                                      | 0.96    | 0.94   | 0.97 | 0.93    | 0.92   | 0.94 | 0.93    | 0.92   | 0.94 |
| Four or more children                                               | 1.03    | 1.01   | 1.04 | 0.96    | 0.94   | 0.97 | 0.96    | 0.94   | 0.97 |
| Age (years)                                                         | 1.10    | 1.10   | 1.10 | 1.11    | 1.11   | 1.11 | 1.10    | 1.10   | 1.10 |
| Family income (ref. High)                                           |         |        |      |         |        |      |         |        |      |
| Low income                                                          |         |        |      | 1.05    | 1.04   | 1.07 | 1.08    | 1.07   | 1.10 |
| Middle–low income                                                   |         |        |      | 1.17    | 1.15   | 1.18 | 1.14    | 1.13   | 1.15 |
| Middle–high income                                                  |         |        |      | 1.18    | 1.17   | 1.19 | 1.15    | 1.14   | 1.16 |
| Educational level (ref. > 12 years)                                 |         |        |      |         |        |      |         |        |      |
| 10–11 years                                                         |         |        |      | 1.12    | 1.10   | 1.13 | 1.08    | 1.06   | 1.09 |
| ≥ 12 years                                                          |         |        |      | 0.91    | 0.90   | 0.91 | 0.89    | 0.88   | 0.90 |
| Socioeconomic status (ref. professionals)                           |         |        |      |         |        |      |         |        |      |
| Farmers/self-employed/others                                        |         |        |      | 1.73    | 1.71   | 1.76 | 1.63    | 1.60   | 1.65 |
| Blue collar workers                                                 |         |        |      | 1.38    | 1.36   | 1.40 | 1.34    | 1.32   | 1.36 |
| White collar workers                                                |         |        |      | 1.15    | 1.13   | 1.17 | 1.14    | 1.12   | 1.16 |
| Region of residence (ref. Large cities)                             |         |        |      |         |        |      |         |        |      |
| Southern Sweden                                                     |         |        |      | 0.94    | 0.93   | 0.95 | 0.99    | 0.98   | 1.00 |
| Northern Sweden                                                     |         |        |      | 0.98    | 0.97   | 0.99 | 1.08    | 1.07   | 1.09 |
| Immigrant status (ref. Born in Sweden)                              |         |        |      | 1.04    | 1.01   | 1.07 | 1.06    | 1.03   | 1.09 |
| Marital status (ref. Not married)                                   |         |        |      | 1.88    | 1.87   | 1.90 | 1.71    | 1.70   | 1.73 |
| Birth order                                                         |         |        |      | 1.00    | 1.00   | 1.01 | 0.99    | 0.99   | 1.00 |
| Hospitalization of chronic lower respiratory disease (ref. Non)     |         |        |      |         |        |      | 1.28    | 1.26   | 1.30 |
| Hospitalization of alcoholisms and related liver disease (ref. Non) |         |        |      |         |        |      | 3.02    | 2.98   | 3.05 |
| Hospitalization of diabetes (ref. Non)                              |         |        |      |         |        |      | 1.43    | 1.41   | 1.45 |
| Hospitalization of obesity (ref. Non)                               |         |        |      |         |        |      | 1.09    | 1.06   | 1.13 |
| Hospitalization of hypertension (ref. Non)                          |         |        |      |         |        |      | 0.66    | 0.65   | 0.67 |
| Cancer (ref. Non)                                                   |         |        |      |         |        |      | 2.62    | 2.60   | 2.65 |

Model 1. Adjusted for age at start; Model 2. Adjusted for age at start and individual characteristics; Model 3. Model 2 + comorbidities.

**Supplementary Table 4b. Hazard ratio (HR) and 95% confidence interval of mortality in men**

|                                                                     | Model 1 |           | Model 2 |           | Model 3 |           |
|---------------------------------------------------------------------|---------|-----------|---------|-----------|---------|-----------|
|                                                                     | HR      | 95% CI    | HR      | 95% CI    | HR      | 95% CI    |
| Birth order (ref. First birth)                                      |         |           |         |           |         |           |
| Second                                                              | 0.98    | 0.97 0.99 | 0.97    | 0.96 0.98 | 0.96    | 0.95 0.97 |
| Third                                                               | 1.01    | 0.99 1.02 | 0.99    | 0.98 1.01 | 0.98    | 0.96 0.99 |
| Fourth                                                              | 1.04    | 1.01 1.06 | 1.00    | 0.98 1.03 | 0.98    | 0.95 1.00 |
| Fifth+                                                              | 1.11    | 1.08 1.14 | 1.06    | 1.02 1.09 | 1.01    | 0.98 1.05 |
| Age (years)                                                         | 1.10    | 1.10 1.10 | 1.11    | 1.11 1.11 | 1.10    | 1.10 1.10 |
| Family income (ref. High)                                           |         |           |         |           |         |           |
| Low income                                                          |         |           | 1.06    | 1.04 1.07 | 1.08    | 1.07 1.10 |
| Middle–low income                                                   |         |           | 1.17    | 1.15 1.18 | 1.14    | 1.13 1.16 |
| Middle–high income                                                  |         |           | 1.18    | 1.17 1.19 | 1.15    | 1.14 1.16 |
| Educational level (ref. > 12 years)                                 |         |           |         |           |         |           |
| 10–11 years                                                         |         |           | 1.12    | 1.10 1.13 | 1.07    | 1.06 1.09 |
| ≥ 12 years                                                          |         |           | 0.90    | 0.90 0.91 | 0.89    | 0.88 0.90 |
| Socioeconomic status (ref. professionals)                           |         |           |         |           |         |           |
| Farmers/self-employed/others                                        |         |           | 1.73    | 1.71 1.76 | 1.63    | 1.60 1.66 |
| Blue collar workers                                                 |         |           | 1.38    | 1.36 1.40 | 1.34    | 1.32 1.36 |
| White collar workers                                                |         |           | 1.15    | 1.13 1.17 | 1.14    | 1.13 1.16 |
| Region of residence (ref. Large cities)                             |         |           |         |           |         |           |
| Southern Sweden                                                     |         |           | 0.94    | 0.93 0.95 | 0.99    | 0.98 1.00 |
| Northern Sweden                                                     |         |           | 0.98    | 0.97 0.99 | 1.08    | 1.07 1.09 |
| Immigrant status (ref. Born in Sweden)                              |         |           | 1.05    | 1.02 1.08 | 1.06    | 1.03 1.09 |
| Marital status (ref. Not married)                                   |         |           | 1.88    | 1.87 1.90 | 1.71    | 1.70 1.73 |
| Number of siblings                                                  |         |           | 1.00    | 0.99 1.00 | 1.00    | 0.99 1.00 |
| Hospitalization of chronic lower respiratory disease (ref. Non)     |         |           |         |           | 1.28    | 1.26 1.30 |
| Hospitalization of alcoholisms and related liver disease (ref. Non) |         |           |         |           | 3.02    | 2.98 3.05 |
| Hospitalization of diabetes (ref. Non)                              |         |           |         |           | 1.43    | 1.41 1.45 |
| Hospitalization of obesity (ref. Non)                               |         |           |         |           | 1.09    | 1.06 1.13 |
| Hospitalization of hypertension (ref. Non)                          |         |           |         |           | 0.66    | 0.65 0.67 |
| Cancer (ref. Non)                                                   |         |           |         |           | 2.62    | 2.60 2.64 |

Model 1. Adjusted for age at start; Model 2. Adjusted for age at start and individual characteristics; Model 3. Model 2 + comorbidities.

**Supplementary Table 4c. Hazard ratio (HR) and 95% confidence interval of mortality in women**

|                                                                     | Model 1 |        |      | Model 2 |        |      | Model 3 |        |      |
|---------------------------------------------------------------------|---------|--------|------|---------|--------|------|---------|--------|------|
|                                                                     | HR      | 95% CI |      | HR      | 95% CI |      | HR      | 95% CI |      |
| Number of siblings (ref. No sibling)                                |         |        |      |         |        |      |         |        |      |
| One sibling                                                         | 0.92    | 0.91   | 0.94 | 0.93    | 0.92   | 0.95 | 0.94    | 0.93   | 0.95 |
| Two siblings                                                        | 0.92    | 0.91   | 0.94 | 0.91    | 0.90   | 0.93 | 0.92    | 0.91   | 0.94 |
| Three siblings                                                      | 0.95    | 0.93   | 0.96 | 0.92    | 0.90   | 0.93 | 0.93    | 0.91   | 0.95 |
| Four or more children                                               | 1.01    | 0.99   | 1.03 | 0.94    | 0.92   | 0.95 | 0.95    | 0.93   | 0.96 |
| Age (years)                                                         | 1.10    | 1.10   | 1.10 | 1.10    | 1.10   | 1.10 | 1.09    | 1.08   | 1.09 |
| Family income (ref. High)                                           |         |        |      |         |        |      |         |        |      |
| Low income                                                          |         |        |      | 0.84    | 0.83   | 0.86 | 0.94    | 0.93   | 0.96 |
| Middle–low income                                                   |         |        |      | 1.03    | 1.01   | 1.05 | 1.06    | 1.04   | 1.07 |
| Middle–high income                                                  |         |        |      | 1.05    | 1.04   | 1.06 | 1.05    | 1.04   | 1.07 |
| Educational level (ref. > 12 years)                                 |         |        |      |         |        |      |         |        |      |
| 10–11 years                                                         |         |        |      | 1.08    | 1.06   | 1.10 | 1.01    | 1.00   | 1.03 |
| ≥ 12 years                                                          |         |        |      | 0.85    | 0.84   | 0.87 | 0.82    | 0.81   | 0.83 |
| Socioeconomic status (ref. professionals)                           |         |        |      |         |        |      |         |        |      |
| Farmers/self-employed/others                                        |         |        |      | 1.97    | 1.93   | 2.02 | 1.88    | 1.84   | 1.93 |
| Blue collar workers                                                 |         |        |      | 1.36    | 1.33   | 1.39 | 1.35    | 1.32   | 1.38 |
| White collar workers                                                |         |        |      | 1.12    | 1.10   | 1.15 | 1.11    | 1.09   | 1.14 |
| Region of residence (ref. Large cities)                             |         |        |      |         |        |      |         |        |      |
| Southern Sweden                                                     |         |        |      | 1.00    | 0.99   | 1.01 | 1.03    | 1.02   | 1.04 |
| Northern Sweden                                                     |         |        |      | 1.03    | 1.02   | 1.05 | 1.11    | 1.09   | 1.12 |
| Immigrant status (ref. Born in Sweden)                              |         |        |      | 0.89    | 0.86   | 0.92 | 0.95    | 0.92   | 0.99 |
| Marital status (ref. Not married)                                   |         |        |      | 1.63    | 1.62   | 1.65 | 1.48    | 1.47   | 1.50 |
| Birth order                                                         |         |        |      | 1.01    | 1.00   | 1.01 | 1.00    | 0.99   | 1.01 |
| Hospitalization of chronic lower respiratory disease (ref. Non)     |         |        |      |         |        |      | 1.61    | 1.58   | 1.63 |
| Hospitalization of alcoholisms and related liver disease (ref. Non) |         |        |      |         |        |      | 3.26    | 3.20   | 3.32 |
| Hospitalization of diabetes (ref. Non)                              |         |        |      |         |        |      | 1.58    | 1.56   | 1.61 |
| Hospitalization of obesity (ref. Non)                               |         |        |      |         |        |      | 0.96    | 0.93   | 0.99 |
| Hospitalization of hypertension (ref. Non)                          |         |        |      |         |        |      | 0.66    | 0.65   | 0.67 |
| Cancer (ref. Non)                                                   |         |        |      |         |        |      | 4.86    | 4.81   | 4.91 |

Model 1. Adjusted for age at start; Model 2. Adjusted for age at start and individual characteristics; Model 3. Model 2 + comorbidities.

**Supplementary Table 4d. Hazard ratio (HR) and 95% confidence interval of mortality in women**

|                                                                     | Model 1 |        |      | Model 2 |        |      | Model 3 |        |      |
|---------------------------------------------------------------------|---------|--------|------|---------|--------|------|---------|--------|------|
|                                                                     | HR      | 95% CI |      | HR      | 95% CI |      | HR      | 95% CI |      |
| Birth order (ref. First birth)                                      |         |        |      |         |        |      |         |        |      |
| Second                                                              | 0.98    | 0.96   | 0.99 | 0.97    | 0.96   | 0.98 | 0.96    | 0.95   | 0.98 |
| Third                                                               | 1.01    | 1.00   | 1.03 | 1.00    | 0.98   | 1.02 | 0.98    | 0.96   | 1.00 |
| Fourth                                                              | 1.05    | 1.02   | 1.08 | 1.02    | 0.99   | 1.05 | 1.00    | 0.98   | 1.03 |
| Fifth+                                                              | 1.11    | 1.08   | 1.15 | 1.08    | 1.04   | 1.12 | 1.03    | 0.99   | 1.07 |
| Age (years)                                                         | 1.10    | 1.10   | 1.10 | 1.10    | 1.10   | 1.10 | 1.09    | 1.08   | 1.09 |
| Family income (ref. High)                                           |         |        |      |         |        |      |         |        |      |
| Low income                                                          |         |        |      | 0.84    | 0.83   | 0.86 | 0.94    | 0.93   | 0.96 |
| Middle–low income                                                   |         |        |      | 1.03    | 1.02   | 1.05 | 1.06    | 1.04   | 1.07 |
| Middle–high income                                                  |         |        |      | 1.05    | 1.04   | 1.07 | 1.05    | 1.04   | 1.07 |
| Educational level (ref. > 12 years)                                 |         |        |      |         |        |      |         |        |      |
| 10–11 years                                                         |         |        |      | 1.08    | 1.06   | 1.10 | 1.01    | 0.99   | 1.03 |
| ≥ 12 years                                                          |         |        |      | 0.85    | 0.84   | 0.86 | 0.82    | 0.81   | 0.83 |
| Socioeconomic status (ref. professionals)                           |         |        |      |         |        |      |         |        |      |
| Farmers/self-employed/others                                        |         |        |      | 1.98    | 1.93   | 2.02 | 1.88    | 1.84   | 1.93 |
| Blue collar workers                                                 |         |        |      | 1.36    | 1.33   | 1.39 | 1.35    | 1.32   | 1.38 |
| White collar workers                                                |         |        |      | 1.12    | 1.10   | 1.15 | 1.11    | 1.09   | 1.14 |
| Region of residence (ref. Large cities)                             |         |        |      |         |        |      |         |        |      |
| Southern Sweden                                                     |         |        |      | 1.00    | 0.99   | 1.01 | 1.03    | 1.02   | 1.04 |
| Northern Sweden                                                     |         |        |      | 1.03    | 1.02   | 1.05 | 1.11    | 1.09   | 1.12 |
| Immigrant status (ref. Born in Sweden)                              |         |        |      | 0.89    | 0.86   | 0.92 | 0.95    | 0.92   | 0.99 |
| Marital status (ref. Not married)                                   |         |        |      | 1.63    | 1.62   | 1.65 | 1.48    | 1.47   | 1.50 |
| Number of siblings                                                  |         |        |      | 0.99    | 0.99   | 0.99 | 0.99    | 0.99   | 1.00 |
| Hospitalization of chronic lower respiratory disease (ref. Non)     |         |        |      |         |        |      | 1.61    | 1.58   | 1.63 |
| Hospitalization of alcoholisms and related liver disease (ref. Non) |         |        |      |         |        |      | 3.26    | 3.20   | 3.33 |
| Hospitalization of diabetes (ref. Non)                              |         |        |      |         |        |      | 1.58    | 1.56   | 1.61 |
| Hospitalization of obesity (ref. Non)                               |         |        |      |         |        |      | 0.96    | 0.93   | 0.99 |
| Hospitalization of hypertension (ref. Non)                          |         |        |      |         |        |      | 0.66    | 0.65   | 0.67 |
| Cancer (ref. Non)                                                   |         |        |      |         |        |      | 4.86    | 4.81   | 4.91 |

Model 1. Adjusted for age at start; Model 2. Adjusted for age at start and individual characteristics; Model 3. Model 2 + comorbidities.
