# Supplementary material for: Sibling rank and sibling number in relation to cardiovascular disease and mortality risk: a nationwide cohort study
Source: HighWire-hosted journal article supplement (doi:10.1136/bmjopen-2020-042881), 2021-05-25

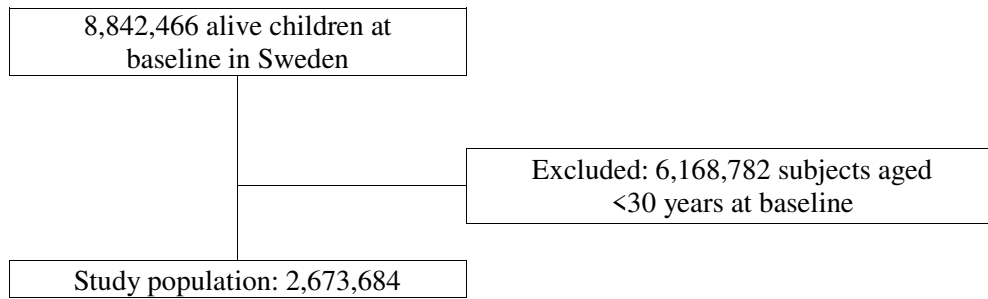

Supplement: bmjopen-2020-042881supp002_data_supplement.pdf [file bmjopen-2020-042881supp002_data_supplement.pdf]
